# Supplementary material for: Systematic Structure-Based Search for Ochratoxin-Degrading Enzymes in Proteomes from Filamentous Fungi
Source: MDPI journal article supplement (doi:10.3390/biom11071040), 2021-07-16
Supplement: s1 [file s1]

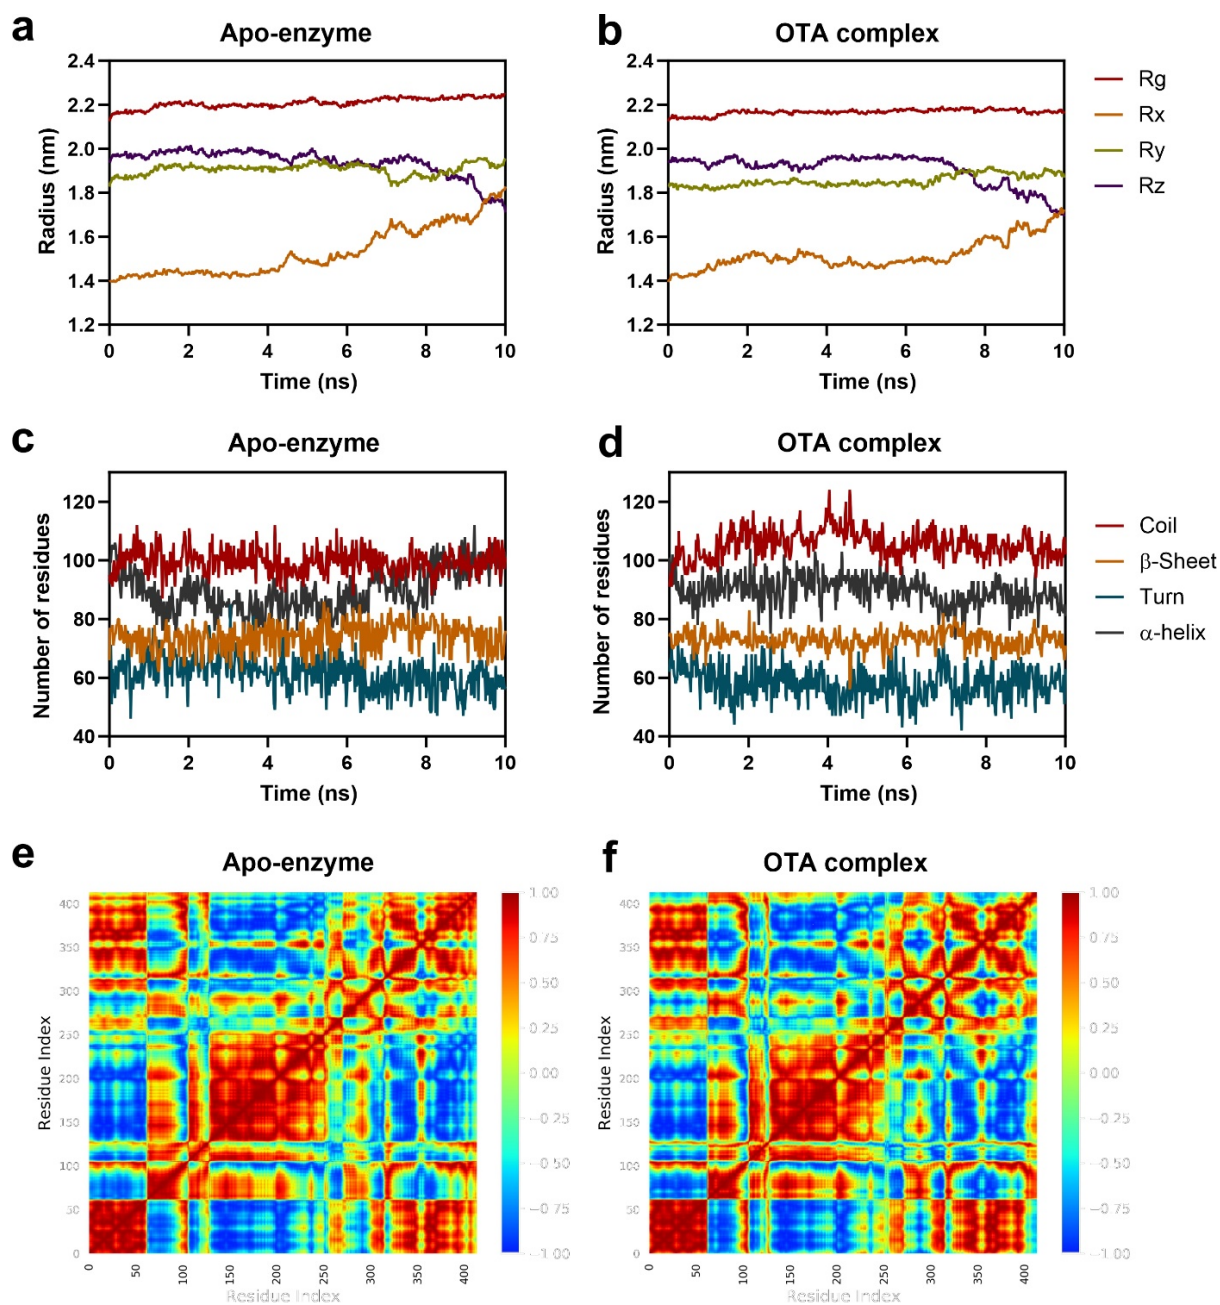

**Figure S3. Radius of gyration, secondary structure, and correlation analysis of the molecular dynamics simulation results comparing the ochratoxinase from *Aspergillus niger* in the apo-form (PDB code: 4C5Y) and complexed with the ochratoxin A (OTA) substrate.** (a, b) evolution of the radius of gyration showing the average protein radius (Rg) and the radius in the 3 cartesian axes (Rx, Ry and Rz) in the ochratoxinase apoenzyme and the corresponding OTA complex; (c, d) Fluctuations of the number of atoms included in different secondary structure elements (coil, beta-sheet, turn and alpha-helix) in the ochratoxinase apo-enzyme and OTA complex; (e, f) average correlation of the C-alpha atoms coordinates during the simulation in the apo-enzyme and OTA complex.
