# Supplementary material for: Systematic Structure-Based Search for Ochratoxin-Degrading Enzymes in Proteomes from Filamentous Fungi
Source: MDPI journal article supplement (doi:10.3390/biom11071040), 2021-07-16
Supplement: s1 [file s1]

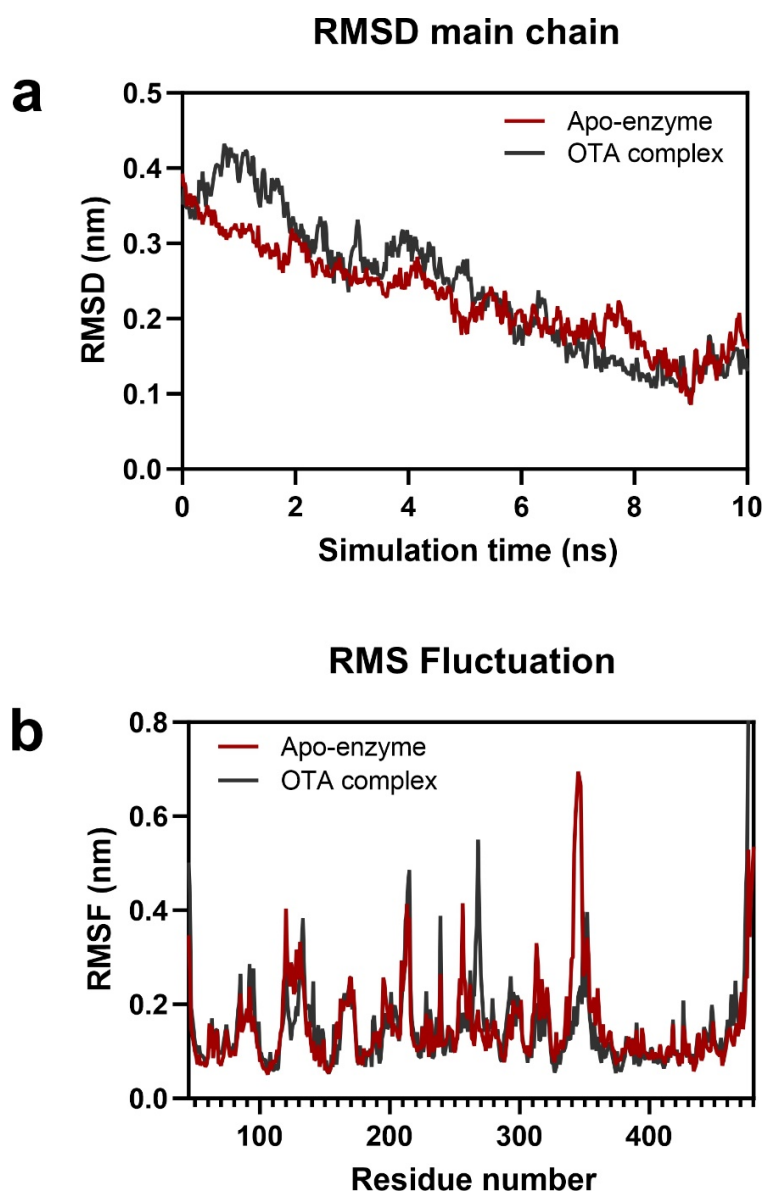

**Figure S2. Root mean square analysis of the molecular dynamics simulation trajectories.** (a) Root mean square deviation of the spatial positions of the main chain protein atoms in the ochratoxinase apoenzyme from *Aspergillus niger* (PDB code: 4C5Y) and the corresponding OTA-bound complex; (b) Average root mean square fluctuations of atomic positions from all the protein residues along the simulation in the same ochratoxinase apo-enzyme compared with the OTA complex.
