# Supplementary material for: Systematic Structure-Based Search for Ochratoxin-Degrading Enzymes in Proteomes from Filamentous Fungi
Source: MDPI journal article supplement (doi:10.3390/biom11071040), 2021-07-16
Supplement: s1 [file s1]

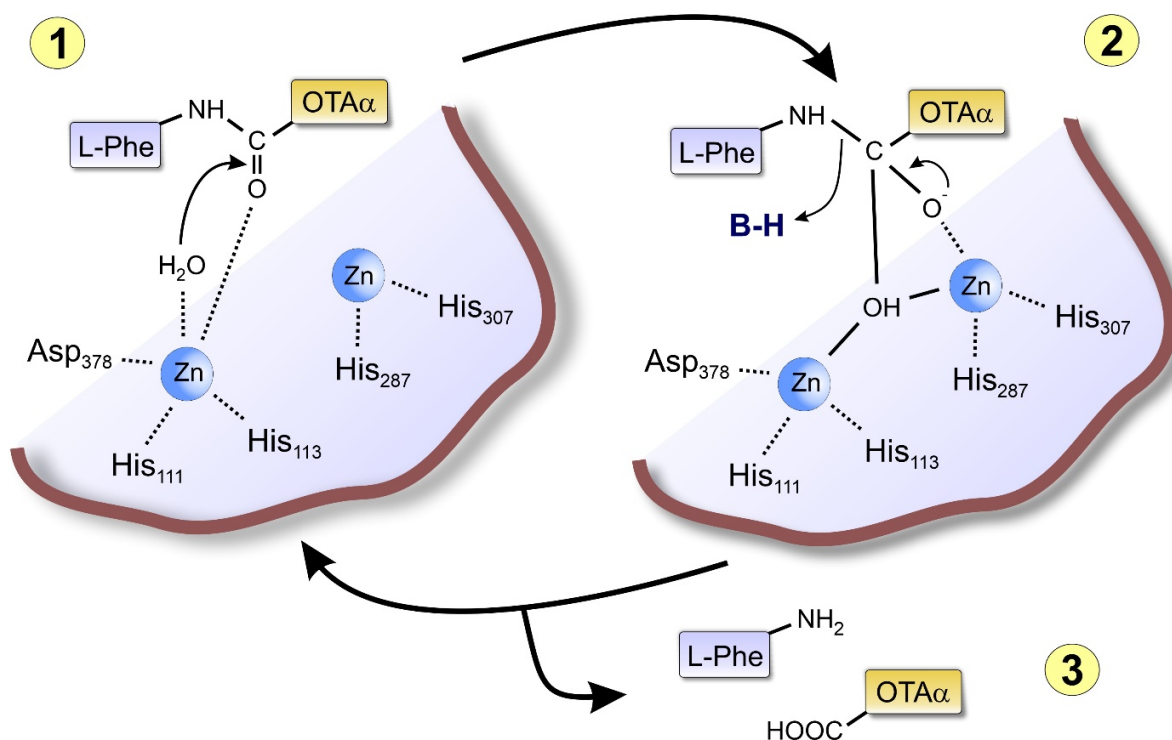

**Figure S1. Proposed mechanism for the hydrolysis of ochratoxin A by ochratoxinase-like enzymes with amidohydrolase activity and harboring a binuclear  $\text{Zn}^{2+}$  center.** A water molecule that occupies one coordination site of a  $\text{Zn}^{2+}$  atom is activated by the presence of a coordinating aspartate residue of the same metal atom. The activated water molecule is responsible for a nucleophilic attack to the amide bond. The oxidized intermediate is stabilized by the presence of the second  $\text{Zn}^{2+}$  atom. Finally, the electrons of the amide bond are transferred to an electron acceptor, and the enzyme releases ochratoxin a and phenyl-alanine.
