# Supplementary material for: Systematic Structure-Based Search for Ochratoxin-Degrading Enzymes in Proteomes from Filamentous Fungi
Source: MDPI journal article supplement (doi:10.3390/biom11071040), 2021-07-16
Supplement: s1 [file s1]

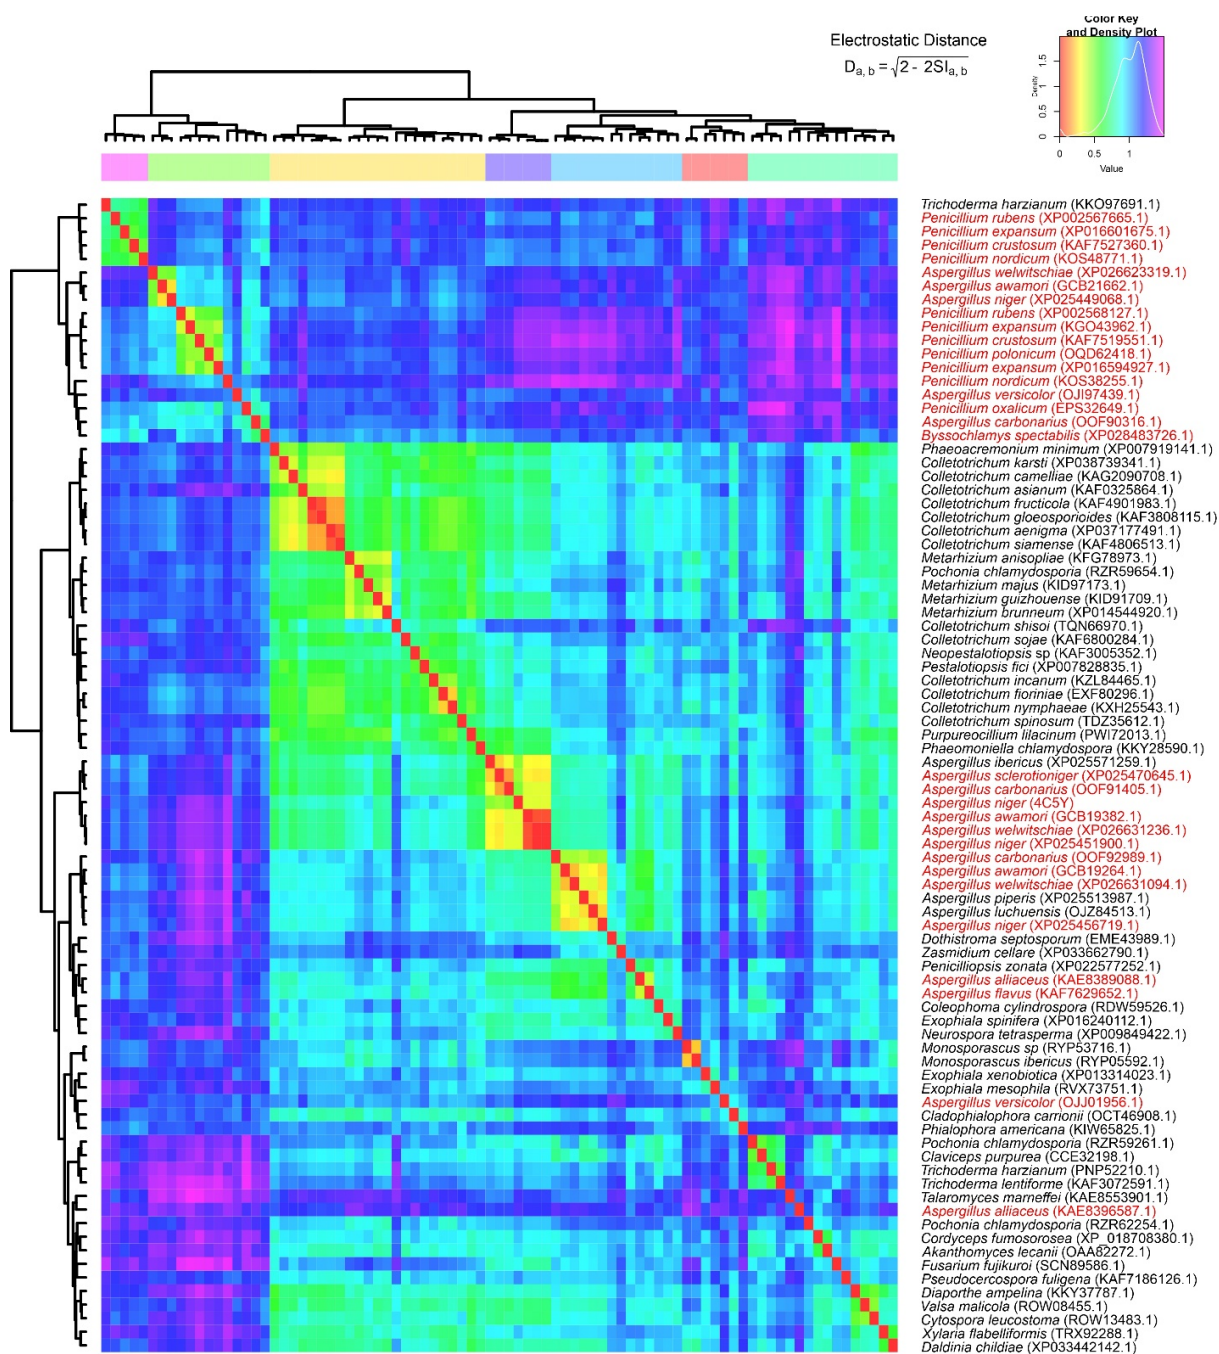

**Figure S5. Comparison of the ochratoxinase-like enzymes based on the individual analysis of electrostatic surfaces in the atomic models.** Hierarchical clustering analysis of the electrostatic distance matrix for the selected group of carboxylic ester hydrolases structures was calculated by the webPIPSA algorithm and the Poisson-Boltzman equation. The enzymes are identified by their producing fungal strain, where the ochratoxin-producing species are depicted in red color.
