# Supplementary material for: Systematic Structure-Based Search for Ochratoxin-Degrading Enzymes in Proteomes from Filamentous Fungi
Source: Biomolecules. 2021 Jul 16;11(7):1040. doi: 10.3390/biom11071040 (PMC8301969; doi:10.3390/biom11071040)
Supplement: Supplementary file 1 [file biomolecules-11-01040-s001.zip › Table S1.xlsx]

## Sheet: Phyre2 models
Structure / Model	ID	Name	Species	OTA Producer	Template	Confidence (%)	Sequence identity (%)	Alignment coverage (%)
emM100	TDZ35612.1	uncharacterized protein C8035 v009756	Colletotrichum spinosum		4C65_A	100	62	88
emMD01	RZR59261.1	hypothetical protein I1G 00000742	Pochonia chlamydosporia 123		4C65_A	100	47	93
emMD02	KOS38255.1	hypothetical protein ACN38 g10923	Penicillium nordicum	YES	3FEQ_B	100	40	86
emMD03	OJJ01956.1	hypothetical protein ASPVEDRAFT 52764	Aspergillus versicolor CBS 583.65	YES	4C65_A	100	43	96
emMD07	XP_038739341.1	hypothetical protein AYL99 02408	Colletotrichum karsti		4C65_A	100	61	89
emMD08	XP_014544920.1	amidohydrolase partial	Metarhizium brunneum ARSEF 3297		4C65_A	100	61	89
emMD09	RVX73751.1	hypothetical protein B0A52 02641	Exophiala mesophila		4C65_A	100	51	89
emMD10	KID97173.1	amidohydrolase partial	Metarhizium majus ARSEF 297		4C65_A	100	60	88
emMD11	KAF7629652.1	hypothetical protein AFLA 013361	Aspergillus flavus NRRL3357	YES	4C65_A	100	48	98
emMD12	XP_033662790.1	uncharacterized protein M409DRAFT 69432	Zasmidium cellare ATCC 36951		4C65_A	100	48	96
emMD13	XP_013314023.1	hypothetical protein PV05 09012	Exophiala_xenobiotica		4C65_A	100	49	87
emMD15	KAF6800284.1	amidohydrolase	Colletotrichum sojae		4C65_A	100	60	91
emMD16	KGO43962.1	amidohydrolase	Penicillium expansum	YES	3MKV_B	100	40	92
emMD17	RZR59654.1	amidohydrolase	Pochonia chlamydosporia 123		4C65_A	100	61	89
emMD18	ROW08455.1	hypothetical protein VMCG 03183	Valsa malicola		4C65_A	100	63	84
emMD20	KAF4806513.1	hypothetical protein	Colletotrichum siamense		4C65_A	100	61	90
emMD21	OOF92989.1	hypothetical protein ASPCADRAFT 398661	Aspergillus carbonarius ITEM 5010	YES	4C65_A	100	49	98
emMD24	KAF7527360.1	hypothetical protein PCG10 002763	Penicillium crustosum	YES	3MKV_B	100	41	94
emMD25	KAF3072591.1	Uncharacterized protein CFAM422 005334	Trichoderma lentiforme		4C65_A	100	47	58
emMD26	KID91709.1	amidohydrolase	Metarhizium guizhouense ARSEF 977		4C65_A	100	61	88
emMD27	XP_026631094.1	hypothetical protein BDQ94DRAFT 181435	Aspergillus welwitschiae	YES	4C65_A	100	47	98
emMD28	KAF3005352.1	hypothetical protein E8E14 005423	Neopestalotiopsis sp. 37M		4C65_A	100	62	83
emMD29	KAF7519551.1	hypothetical protein PCG10 009957	Penicillium crustosum	YES	3MKV_B	100	40	92
emMD30	XP_033442142.1	uncharacterized protein GL218 00521	Daldinia childiae		4C65_A	100	62	90
emMD31	KAG2090708.1	amidohydrolase	Colletotrichum camelliae		4C65_A	100	61	91
emMD32	KAE8389088.1	hypothetical protein BDV23DRAFT 194721	Aspergillus alliaceus	YES	4C65_A	100	47	98
emMD33	XP_022577252.1	hypothetical protein ASPZODRAFT 137136	Penicilliopsis zonata CBS 506.65		4C65_A	100	47	99
emMD34	XP_037177491.1	Uncharacterized protein CGCA056 v008987	Colletotrichum aenigma		4C65_A	100	61	90
emMD35	KAE8396587.1	imidazolonepropionase	Aspergillus alliaceus	YES	3MKV_B	100	40	92
emMD36	KOS48771.1	hypothetical protein ACN38 g306	Penicillium nordicum	YES	3MKV_B	100	40	94
emMD37	OAA82272.1	amidohydrolase	Akanthomyces lecanii RCEF 1005		4C65_A	100	54	92
emMD38	XP_016594927.1	amidohydrolase	Penicillium expansum	YES	3MKV_B	100	41	92
emMD39	XP_016601675.1	amidohydrolase	Penicillium expansum	YES	3MKV_B	100	40	94
emMD40	KFG78973.1	amidohydrolase	Metarhizium anisopliae		4C65_A	100	61	88
emMD41	TRX92288.1	hypothetical protein FHL15 006903	Xylaria flabelliformis		4C65_A	100	59	88
emMD42	SCN89586.1	aryldialkylphosphatase related protein	Fusarium fujikuroi		4C65_A	100	46	81
emMD43	XP_028483726.1	hypothetical protein C8Q69DRAFT 472571	Byssochlamys spectabilis	YES	3MKV_B	100	42	88
emMD44	KAF4901983.1	hypothetical protein	Colletotrichum fructicola		4C65_A	100	61	90
emMD45	KXH25543.1	amidohydrolase	Colletotrichum nymphaeae SA-01		4C65_A	100	63	89
emMD46	CCE32198.1	linoleate diol-synthase	Claviceps purpurea 20.1		4C65_A	100	44	94
emMD47	XP_025513987.1	amidohydrolase	Aspergillus piperis CBS112811		4C65_A	100	48	98
emMD50	XP_002567665.1	Pc21g06200	Penicillium rubens Wisconsin 54-1255	YES	3MKV_B	100	40	94
emMD51	GCB19264.1	uncharacterized protein YJL213W	Aspergillus awamori	YES	4C65_A	100	48	98
emMD52	EXF80296.1	amidohydrolase	Colletotrichum fioriniae PJ7		4C65_A	100	63	90
emMD53	EME43989.1	hypothetical protein DOTSEDRAFT 171944	Dothistroma septosporum NZE10		4C65_A	100	48	93
emMD54	XP_026623319.1	hypothetical protein BDQ94DRAFT 148814	Aspergillus welwitschiae	YES	3MKV_B	100	40	92
emMD55	XP_018708380.1	amidohydrolase	Cordyceps fumosorosea ARSEF 2679		4C65_A	100	53	85
emMD56	OQD62418.1	hypothetical protein PENPOL c012G10666	Penicillium polonicum	YES	3MKV_B	100	41	92
emMD57	RYP53716.1	hypothetical protein DL768 001316	Monosporascus sp. mg162		4C65_A	100	58	90
emMD58	RDW59526.1	hypothetical protein BP6252 12613	Coleophoma cylindrospora		4C65_A	100	50	93
emMD59	RZR62254.1	amidohydrolase	Pochonia chlamydosporia 123		4C65_A	100	58	88
emMD60	XP_007919141.1	putative amidohydrolase protein	Phaeoacremonium minimum UCRPA7		4C65_A	100	64	86
emMD61	KKY28590.1	putative amidohydrolase	Phaeomoniella chlamydospora		4C65_A	100	64	86
emMD62	XP_025571259.1	amidohydrolase	Aspergillus ibericus CBS 121593		4C65_A	100	89	90
emMD65	PNP52210.1	hypothetical protein THARTR1 07419	Trichoderma harzianum		4C65_A	100	45	94
emMD66	KAF0325864.1	amidohydrolase	Colletotrichum asianum		4C65_A	100	59	90
emMD67	EPS32649.1	hypothetical protein PDE 07609	Penicillium oxalicum 114-2	YES	3MKV_B	100	42	91
emMD68	ROW13483.1	hypothetical protein VPNG 04489	Cytospora leucostoma		4C65_A	100	62	77
emMD70	KAF7186126.1	hypothetical protein HII31 12541	Pseudocercospora fuligena		4C65_A	100	48	93
emMD71	XP_025456719.1	uncharacterized protein BO96DRAFT 362933	Aspergillus niger CBS 101883	YES	4C65_A	100	48	98
emMD73	XP_016240112.1	hypothetical protein PV08 00471	Exophiala spinifera		4C65_A	100	47	99
emMD74	TQN66970.1	hypothetical protein CSHISOI 08516	Colletotrichum shisoi		4C65_A	100	62	89
emMD75	KZL84465.1	amidohydrolase	Colletotrichum incanum		4C65_A	100	63	90
emMD77	XP_002568127.1	Pc21g10950	Penicillium rubens Wisconsin 54-1255	YES	3MKV_B	100	39	92
emMD78	OJZ84513.1	hypothetical protein ASPFODRAFT 48558	Aspergillus luchuensis CBS 106.47		4C65_A	100	48	98
emMD79	KKO97691.1	amidohydrolase	Trichoderma harzianum		3MKV_B	100	43	94
emMD80	XP_025470645.1	amidohydrolase	Aspergillus sclerotioniger CBS 115572	YES	4C65_A	100	89	90
emMD81	KIW65825.1	hypothetical protein PV04 08046	Phialophora americana		4C65_A	100	48	85
emMD82	XP_007828835.1	hypothetical protein PFICI 02063	Pestalotiopsis fici W106-1		4C65_A	100	59	95
emMD83	OOF90316.1	hypothetical protein ASPCADRAFT 179287	Aspergillus carbonarius ITEM 5010	YES	3MKV_B	100	40	92
emMD84	XP_025451900.1	uncharacterized protein BO96DRAFT 414511	Aspergillus niger CBS 101883	YES	4C65_A	100	100	90
emMD85	GCB19382.1	uncharacterized protein YJL213W	Aspergillus awamori	YES	4C65_A	100	100	90
emMD86	XP_025449068.1	uncharacterized protein BO96DRAFT 202102	Aspergillus niger CBS 101883	YES	3MKV_B	100	40	92
emMD87	KAF3808115.1	hypothetical protein GCG54 00012695	Colletotrichum gloeosporioides		4C65_A	100	60	89
emMD88	PWI72013.1	amidohydrolase	Purpureocillium_lilacinum		4C65_A	100	61	81
emMD89	KKY37787.1	putative amidohydrolase	Diaporthe ampelina		4C65_A	100	60	93
emMD90	OCT46908.1	amidohydrolase	Cladophialophora carrionii		4C65_A	100	51	85
emMD91	XP_009849422.1	hypothetical protein NEUTE1DRAFT 99338	Neurospora tetrasperma FGSC 2508		4C65_A	100	47	95
emMD92	OJI97439.1	hypothetical protein ASPVEDRAFT 36853	Aspergillus versicolor CBS 583.65	YES	3MKV_B	100	43	93
emMD93	GCB21662.1	uncharacterized protein YJL213W	Aspergillus awamori	YES	3MKV_B	100	41	92
emMD94	RYP05592.1	hypothetical protein DL764 003705	Monosporascus ibericus		4C65_A	100	58	90
emMD95	KAE8553901.1	hypothetical protein EYB25 002439	Talaromyces marneffei		4C65_A	100	50	93
emMD97	OOF91405.1	hypothetical protein ASPCADRAFT 57515	Aspergillus carbonarius ITEM 5010	YES	4C65_A	100	88	96
