# Supplementary material for: Systematic Structure-Based Search for Ochratoxin-Degrading Enzymes in Proteomes from Filamentous Fungi
Source: Biomolecules. 2021 Jul 16;11(7):1040. doi: 10.3390/biom11071040 (PMC8301969; doi:10.3390/biom11071040)
Supplement: Supplementary file 1 [file biomolecules-11-01040-s001.zip › Table S2.xlsx]

## Sheet: Ochratoxin A
Structure / Model	ID	Name	Species	OTA Producer	Pocket volume (A3)	DeltaG	Vol/G	G/Vol
4CY5	A2R2V4	Ochratoxinase	Aspergillus niger	YES	1241	-10.8	-114.907	-0.00870266
emMD84	XP_025451900.1	uncharacterized protein BO96DRAFT 414511	Aspergillus niger CBS 101883	YES	1291	-10.1	-127.822	0.0790163
emMD85	GCB19382.1	uncharacterized protein YJL213W	Aspergillus awamori	YES	1291	-10.1	-127.822	0.0790163
emMD89	KKY37787.1	putative amidohydrolase	Diaporthe ampelina		3068	-10.1	-303.762	0.0332497
emMD35	KAE8396587.1	imidazolonepropionase	Aspergillus alliaceus	YES	2484	-10	-248.4	-0.00402576
emMD77	XP_002568127.1	Pc21g10950	Penicillium rubens Wisconsin 54-1255	YES	1571	-9.9	-158.687	0.062387
emMD18	ROW08455.1	hypothetical protein VMCG 03183	Valsa malicola		2629	-9.7	-271.031	-0.00368962
emMD44	KAF4901983.1	hypothetical protein	Colletotrichum fructicola		613	-9.7	-63.1959	-0.0158238
emMD87	KAF3808115.1	hypothetical protein GCG54 00012695	Colletotrichum gloeosporioides		631	-9.7	-65.0515	0.149113
emMD28	KAF3005352.1	hypothetical protein E8E14 005423	Neopestalotiopsis sp. 37M		911	-9.6	-94.8958	-0.0105379
emMD66	KAF0325864.1	amidohydrolase	Colletotrichum asianum		751	-9.6	-78.2292	-0.012783
emMD34	XP_037177491.1	Uncharacterized protein CGCA056 v008987	Colletotrichum aenigma		1122	-9.5	-118.105	-0.00846702
emMD62	XP_025571259.1	amidohydrolase	Aspergillus ibericus CBS 121593		1251	-9.5	-131.684	-0.00759392
emMD20	KAF4806513.1	hypothetical protein	Colletotrichum siamense		751	-9.4	-79.8936	-0.0125166
emMD68	ROW13483.1	hypothetical protein VPNG 04489	Cytospora leucostoma		2984	-9.4	-317.447	-0.00315013
emMD75	KZL84465.1	amidohydrolase	Colletotrichum incanum		844	-9.4	-89.7872	0.104692
emMD91	XP_009849422.1	hypothetical protein NEUTE1DRAFT 99338	Neurospora tetrasperma FGSC 2508		7622	-9.4	-810.851	0.0115928
emMD55	XP_018708380.1	amidohydrolase	Cordyceps fumosorosea ARSEF 2679		1794	-9.3	-192.903	-0.00518395
emMD07	XP_038739341.1	hypothetical protein AYL99 02408	Colletotrichum karsti		856	-9.2	-93.0435	-0.0107477
emMD16	KGO43962.1	amidohydrolase	Penicillium expansum	YES	1130	-9.2	-122.826	-0.00814159
emMD31	KAG2090708.1	amidohydrolase	Colletotrichum camelliae		781	-9.2	-84.8913	-0.0117798
emMD42	SCN89586.1	aryldialkylphosphatase related protein	Fusarium fujikuroi		2235	-9.2	-242.935	-0.00411633
emMD73	XP_016240112.1	hypothetical protein PV08 00471	Exophiala spinifera		8172	-9.2	-888.261	0.0103573
emMD80	XP_025470645.1	amidohydrolase	Aspergillus sclerotioniger CBS 115572	YES	1294	-9.2	-140.652	0.0654096
emMD15	KAF6800284.1	amidohydrolase	Colletotrichum sojae		771	-9.1	-84.7253	-0.0118029
emMD47	XP_025513987.1	amidohydrolase	Aspergillus piperis CBS112811		5921	-9.1	-650.659	-0.0015369
emMD71	XP_025456719.1	uncharacterized protein BO96DRAFT 362933	Aspergillus niger CBS101883	YES	4549	-9.1	-499.89	0.018204
emMD81	KIW65825.1	hypothetical protein PV04 08046	Phialophora americana		2522	-9.1	-277.143	0.0328351
emMD97	OOF91405.1	hypothetical protein ASPCADRAFT 57515	Aspergillus carbonarius ITEM 5010	YES	1493	-9.1	-164.066	0.0554655
emMD03	OJJ01956.1	hypothetical protein ASPVEDRAFT 52764	Aspergillus versicolor CBS 583.65	YES	3257	-8.9	-365.955	-0.00273258
emMD33	XP_022577252.1	hypothetical protein ASPZODRAFT 137136	Penicilliopsis zonata CBS 506.65		10355	-8.9	-1163.48	-0.000859488
emMD36	KOS48771.1	hypothetical protein ACN38 g306	Penicillium nordicum	YES	2149	-8.9	-241.461	-0.00414146
emMD09	RVX73751.1	hypothetical protein B0A52 02641	Exophiala mesophila		2179	-8.7	-250.46	-0.00399266
emMD21	OOF92989.1	hypothetical protein ASPCADRAFT 398661	Aspergillus carbonarius ITEM 5010	YES	2450	-8.7	-281.609	-0.00355102
emMD26	KID91709.1	amidohydrolase	Metarhizium guizhouense ARSEF 977		8195	-8.7	-941.954	-0.00106162
emMD37	OAA82272.1	amidohydrolase	Akanthomyces lecanii RCEF 1005		1821	-8.7	-209.31	-0.00477759
emMD46	CCE32198.1	linoleate diol-synthase	Claviceps purpurea 20.1		5230	-8.7	-601.149	-0.00166348
emMD50	XP_002567665.1	Pc21g06200	Penicillium rubens Wisconsin 54-1255	YES	6854	-8.7	-787.816	-0.00126933
emMD57	RYP53716.1	hypothetical protein DL768 001316	Monosporascus sp. mg162		2611	-8.7	-300.115	-0.00333206
emMD78	OJZ84513.1	hypothetical protein ASPFODRAFT 48558	Aspergillus luchuensis CBS 106.47		4391	-8.7	-504.713	0.0172375
emMD94	RYP05592.1	hypothetical protein DL764 003705	Monosporascus ibericus		2587	-8.7	-297.356	0.0292578
emMD13	XP_013314023.1	hypothetical protein PV05 09012	Exophiala_xenobiotica		3654	-8.6	-424.884	-0.00235359
emMD27	XP_026631094.1	hypothetical protein BDQ94DRAFT 181435	Aspergillus welwitschiae	YES	2519	-8.6	-292.907	-0.00341405
emMD40	KFG78973.1	amidohydrolase	Metarhizium anisopliae		6428	-8.6	-747.442	-0.0013379
emMD90	OCT46908.1	amidohydrolase	Cladophialophora carrionii		5806	-8.6	-675.116	0.0127385
emM100	TDZ35612.1	uncharacterized protein C8035 v009756	Colletotrichum spinosum		2340	-8.5	-275.294	0.0308761
emMD10	KID97173.1	amidohydrolase partial	Metarhizium majus ARSEF 297		6291	-8.5	-740.118	-0.00135114
emMD32	KAE8389088.1	hypothetical protein BDV23DRAFT 194721	Aspergillus alliaceus	YES	4670	-8.5	-549.412	-0.00182013
emMD51	GCB19264.1	uncharacterized protein YJL213W	Aspergillus awamori	YES	4383	-8.5	-515.647	-0.00193931
emMD60	XP_007919141.1	putative amidohydrolase protein	Phaeoacremonium minimum UCRPA7		1148	-8.5	-135.059	-0.00740418
emMD67	EPS32649.1	hypothetical protein PDE 07609	Penicillium oxalicum 114-2	YES	2387	-8.5	-280.824	-0.00356096
emMD70	KAF7186126.1	hypothetical protein HII31 12541	Pseudocercospora fuligena		5670	-8.5	-667.059	-0.00149912
emMD74	TQN66970.1	hypothetical protein CSHISOI 08516	Colletotrichum shisoi		14963	-8.5	-1760.35	0.00482858
emMD88	PWI72013.1	amidohydrolase	Purpureocillium_lilacinum		3513	-8.5	-413.294	0.0205665
emMD41	TRX92288.1	hypothetical protein FHL15 006903	Xylaria flabelliformis		3432	-8.4	-408.571	-0.00244755
emMD86	XP_025449068.1	uncharacterized protein BO96DRAFT 202102	Aspergillus niger CBS 101883	YES	4632	-8.4	-551.429	0.0152332
emMD95	KAE8553901.1	hypothetical protein EYB25 002439	Talaromyces marneffei		2817	-8.4	-335.357	0.0250479
emMD02	KOS38255.1	hypothetical protein ACN38 g10923	Penicillium nordicum	YES	635	-8.3	-76.506	-0.0130709
emMD11	KAF7629652.1	hypothetical protein AFLA 013361	Aspergillus flavus NRRL3357	YES	2192	-8.3	-264.096	-0.0037865
emMD17	RZR59654.1	amidohydrolase	Pochonia chlamydosporia 123		3174	-8.3	-382.41	-0.002615
emMD29	KAF7519551.1	hypothetical protein PCG10 009957	Penicillium crustosum	YES	4119	-8.3	-496.265	-0.00201505
emMD53	EME43989.1	hypothetical protein DOTSEDRAFT 171944	Dothistroma septosporum NZE10		3078	-8.3	-370.843	-0.00269656
emMD58	RDW59526.1	hypothetical protein BP6252 12613	Coleophoma cylindrospora		9169	-8.3	-1104.7	-0.000905224
emMD25	KAF3072591.1	Uncharacterized protein CFAM422 005334	Trichoderma lentiforme		2094	-8.2	-255.366	-0.00391595
emMD12	XP_033662790.1	uncharacterized protein M409DRAFT 69432	Zasmidium cellare ATCC 36951		10777	-8.1	-1330.49	-0.000751601
emMD30	XP_033442142.1	uncharacterized protein GL218 00521	Daldinia childiae		10829	-8.1	-1336.91	-0.000747992
emMD79	KKO97691.1	amidohydrolase	Trichoderma harzianum		1779	-8.1	-219.63	0.0368803
emMD01	RZR59261.1	hypothetical protein I1G 00000742	Pochonia chlamydosporia 123		1367	-8	-170.875	-0.00585223
emMD65	PNP52210.1	hypothetical protein THARTR1 07419	Trichoderma harzianum		6895	-7.9	-872.785	-0.00114576
emMD08	XP_014544920.1	amidohydrolase partial	Metarhizium brunneum ARSEF 3297		6645	-7.8	-851.923	-0.00117381
emMD83	OOF90316.1	hypothetical protein ASPCADRAFT 179287	Aspergillus carbonarius ITEM 5010	YES	3500	-7.8	-448.718	0.0173829
emMD38	XP_016594927.1	amidohydrolase	Penicillium expansum	YES	1746	-7.7	-226.753	-0.00441008
emMD92	OJI97439.1	hypothetical protein ASPVEDRAFT 36853	Aspergillus versicolor CBS 583.65	YES	2647	-7.6	-348.289	0.0218209
emMD93	GCB21662.1	uncharacterized protein YJL213W	Aspergillus awamori	YES	435	-7.52	-57.8457	0.130001
emMD54	XP_026623319.1	hypothetical protein BDQ94DRAFT 148814	Aspergillus welwitschiae	YES	978	-7.5	-130.4	-0.00766871
emMD56	OQD62418.1	hypothetical protein PENPOL c012G10666	Penicillium polonicum	YES	1687	-7.4	-227.973	-0.00438648
emMD59	RZR62254.1	amidohydrolase	Pochonia chlamydosporia 123		927	-7.4	-125.27	-0.00798274
emMD39	XP_016601675.1	amidohydrolase	Penicillium expansum	YES	902	-7.3	-123.562	-0.00809313
emMD82	XP_007828835.1	hypothetical protein PFICI 02063	Pestalotiopsis fici W106-1		1081	-7.2	-150.139	0.0479556
emMD24	KAF7527360.1	hypothetical protein PCG10 002763	Penicillium crustosum	YES	1157	-7.1	-162.958	-0.00613656
emMD43	XP_028483726.1	hypothetical protein C8Q69DRAFT 472571	Byssochlamys spectabilis	YES	646	-7.1	-90.9859	-0.0109907
emMD45	KXH25543.1	amidohydrolase	Colletotrichum nymphaeae SA-01		1856	-7	-265.143	-0.00377155
emMD52	EXF80296.1	amidohydrolase	Colletotrichum fioriniae PJ7		1853	-7	-264.714	-0.00377766
emMD61	KKY28590.1	putative amidohydrolase	Phaeomoniella chlamydospora		933	-6.5	-143.538	-0.00696677

## Sheet: Ochratoxin B
Structure / Model	ID	Name	Species	OTA Producer	Pocket volume (A3)	DeltaG	Vol/G	G/Vol
4CY5	A2R2V4	Ochratoxinase	Aspergillus niger CBS 101883	YES	1241	-10.7	-115.981	-0.00862208
emMD89	KKY37787.1	putative amidohydrolase	Diaporthe ampelina		3068	-10.2	-300.784	-0.00332464
emMD35	KAE8396587.1	imidazolonepropionase	Aspergillus alliaceus	YES	2484	-9.7	-256.082	-0.00390499
emMD84	XP_025451900.1	uncharacterized protein BO96DRAFT 414511	Aspergillus niger CBS 101883	YES	1291	-9.7	-133.093	-0.00751356
emMD85	GCB19382.1	uncharacterized protein YJL213W	Aspergillus awamori	YES	1291	-9.7	-133.093	-0.00751356
emMD44	KAF4901983.1	hypothetical protein	Colletotrichum fructicola		613	-9.6	-63.8542	-0.0156607
emMD75	KZL84465.1	amidohydrolase	Colletotrichum incanum		844	-9.6	-87.9167	-0.0113744
emMD87	KAF3808115.1	hypothetical protein GCG54 00012695	Colletotrichum gloeosporioides		631	-9.6	-65.7292	-0.0152139
emMD34	XP_037177491.1	Uncharacterized protein CGCA056 v008987	Colletotrichum aenigma		1122	-9.5	-118.105	-0.00846702
emMD73	XP_016240112.1	hypothetical protein PV08 00471	Exophiala spinifera		8172	-9.5	-860.211	-0.00116251
emMD77	XP_002568127.1	Pc21g10950	Penicillium rubens Wisconsin 54-1255	YES	1571	-9.5	-165.368	-0.0060471
emMD07	XP_038739341.1	hypothetical protein AYL99 02408	Colletotrichum karsti		856	-9.4	-91.0638	-0.0109813
emMD18	ROW08455.1	hypothetical protein VMCG 03183	Valsa malicola		2629	-9.4	-279.681	-0.0035755
emMD20	KAF4806513.1	hypothetical protein	Colletotrichum siamense		751	-9.4	-79.8936	-0.0125166
emMD66	KAF0325864.1	amidohydrolase	Colletotrichum asianum		751	-9.4	-79.8936	-0.0125166
emMD81	KIW65825.1	hypothetical protein PV04 08046	Phialophora americana		2522	-9.4	-268.298	-0.0037272
emMD62	XP_025571259.1	amidohydrolase	Aspergillus ibericus CBS 121593		1251	-9.2	-135.978	-0.00735412
emMD68	ROW13483.1	hypothetical protein VPNG 04489	Cytospora leucostoma		2984	-9.2	-324.348	-0.00308311
emMD80	XP_025470645.1	amidohydrolase	Aspergillus sclerotioniger CBS 115572	YES	1294	-9.2	-140.652	-0.00710974
emMD97	OOF91405.1	hypothetical protein ASPCADRAFT 57515	Aspergillus carbonarius ITEM 5010	YES	1493	-9.2	-162.283	-0.00616209
emMD15	KAF6800284.1	amidohydrolase	Colletotrichum sojae		771	-9.1	-84.7253	-0.0118029
emMD42	SCN89586.1	aryldialkylphosphatase related protein	Fusarium fujikuroi		2235	-9.1	-245.604	-0.00407159
emMD83	OOF90316.1	hypothetical protein ASPCADRAFT 179287	Aspergillus carbonarius ITEM 5010	YES	3500	-9.1	-384.615	-0.0026
emMD16	KGO43962.1	amidohydrolase	Penicillium expansum	YES	1130	-9	-125.556	-0.0079646
emMD91	XP_009849422.1	hypothetical protein NEUTE1DRAFT 99338	Neurospora tetrasperma FGSC 2508		7622	-9	-846.889	-0.00118079
emMD55	XP_018708380.1	amidohydrolase	Cordyceps fumosorosea ARSEF 2679		1794	-8.9	-201.573	-0.00496098
emMD70	KAF7186126.1	hypothetical protein HII31 12541	Pseudocercospora fuligena		5670	-8.9	-637.079	-0.00156966
emMD71	XP_025456719.1	uncharacterized protein BO96DRAFT 362933	Aspergillus niger CBS 101883	YES	4549	-8.9	-511.124	-0.00195647
emMD90	OCT46908.1	amidohydrolase	Cladophialophora carrionii		5806	-8.9	-652.36	-0.0015329
emMD21	OOF92989.1	hypothetical protein ASPCADRAFT 398661	Aspergillus carbonarius ITEM 5010	YES	2450	-8.7	-281.609	-0.00355102
emMD78	OJZ84513.1	hypothetical protein ASPFODRAFT 48558	Aspergillus luchuensis CBS 106.47		4391	-8.7	-504.713	-0.00198133
emMD86	XP_025449068.1	uncharacterized protein BO96DRAFT 202102	Aspergillus niger CBS 101883	YES	4632	-8.7	-532.414	-0.00187824
emMD92	OJI97439.1	hypothetical protein ASPVEDRAFT 36853	Aspergillus versicolor CBS 583.65	YES	2647	-8.7	-304.253	-0.00328674
emMD03	OJJ01956.1	hypothetical protein ASPVEDRAFT 52764	Aspergillus versicolor CBS 583.65	YES	3283	-8.6	-381.744	-0.00261956
emMD26	KID91709.1	amidohydrolase	Metarhizium guizhouense ARSEF 977		8195	-8.6	-952.907	-0.00104942
emMD27	XP_026631094.1	hypothetical protein BDQ94DRAFT 181435	Aspergillus welwitschiae	YES	2519	-8.6	-292.907	-0.00341405
emMD47	XP_025513987.1	amidohydrolase	Aspergillus piperis CBS112811		5921	-8.6	-688.488	-0.00145246
emMD51	GCB19264.1	uncharacterized protein YJL213W	Aspergillus awamori	YES	4383	-8.6	-509.651	-0.00196213
emM100	TDZ35612.1	uncharacterized protein C8035 v009756	Colletotrichum spinosum		2340	-8.5	-275.294	-0.00363248
emMD13	XP_013314023.1	hypothetical protein PV05 09012	Exophiala_xenobiotica		3654	-8.5	-429.882	-0.00232622
emMD28	KAF3005352.1	hypothetical protein E8E14 005423	Neopestalotiopsis sp. 37M		911	-8.5	-107.176	-0.00933041
emMD31	KAG2090708.1	amidohydrolase	Colletotrichum camelliae		781	-8.5	-91.8824	-0.0108835
emMD32	KAE8389088.1	hypothetical protein BDV23DRAFT 194721	Aspergillus alliaceus	YES	4670	-8.5	-549.412	-0.00182013
emMD50	XP_002567665.1	Pc21g06200	Penicillium rubens Wisconsin 54-1255	YES	6854	-8.5	-806.353	-0.00124015
emMD57	RYP53716.1	hypothetical protein DL768 001316	Monosporascus sp. mg162		2611	-8.5	-307.176	-0.00325546
emMD65	PNP52210.1	hypothetical protein THARTR1 07419	Trichoderma harzianum		6895	-8.5	-811.176	-0.00123278
emMD93	GCB21662.1	uncharacterized protein YJL213W	Aspergillus awamori	YES	435	-8.5	-51.1765	-0.0195402
emMD94	RYP05592.1	hypothetical protein DL764 003705	Monosporascus ibericus		2587	-8.5	-304.353	-0.00328566
emMD09	RVX73751.1	hypothetical protein B0A52 02641	Exophiala mesophila		2179	-8.4	-259.405	-0.00385498
emMD11	KAF7629652.1	hypothetical protein AFLA 013361	Aspergillus flavus NRRL3357	YES	2192	-8.4	-260.952	-0.00383212
emMD36	KOS48771.1	hypothetical protein ACN38 g306	Penicillium nordicum	YES	2149	-8.4	-255.833	-0.00390879
emMD37	OAA82272.1	amidohydrolase	Akanthomyces lecanii RCEF 1005		1821	-8.4	-216.786	-0.00461285
emMD41	TRX92288.1	hypothetical protein FHL15 006903	Xylaria flabelliformis		3432	-8.4	-408.571	-0.00244755
emMD46	CCE32198.1	linoleate diol-synthase	Claviceps purpurea 20.1		5230	-8.4	-622.619	-0.00160612
emMD58	RDW59526.1	hypothetical protein BP6252 12613	Coleophoma cylindrospora		9169	-8.4	-1091.55	-0.00091613
emMD67	EPS32649.1	hypothetical protein PDE 07609	Penicillium oxalicum 114-2	YES	2387	-8.4	-284.167	-0.00351906
emMD88	PWI72013.1	amidohydrolase	Purpureocillium_lilacinum		3513	-8.4	-418.214	-0.00239112
emMD10	KID97173.1	amidohydrolase partial	Metarhizium majus ARSEF 297		6291	-8.3	-757.952	-0.00131935
emMD29	KAF7519551.1	hypothetical protein PCG10 009957	Penicillium crustosum	YES	4119	-8.3	-496.265	-0.00201505
emMD33	XP_022577252.1	hypothetical protein ASPZODRAFT 137136	Penicilliopsis zonata CBS 506.65		10355	-8.3	-1247.59	-0.000801545
emMD53	EME43989.1	hypothetical protein DOTSEDRAFT 171944	Dothistroma septosporum NZE10		3078	-8.3	-370.843	-0.00269656
emMD02	KOS38255.1	hypothetical protein ACN38 g10923	Penicillium nordicum	YES	635	-8.2	-77.439	-0.0129134
emMD30	XP_033442142.1	uncharacterized protein GL218 00521	Daldinia childiae		10829	-8.2	-1320.61	-0.000757226
emMD40	KFG78973.1	amidohydrolase	Metarhizium anisopliae		6428	-8.2	-783.902	-0.00127567
emMD60	XP_007919141.1	putative amidohydrolase protein	Phaeoacremonium minimum UCRPA7		1148	-8.2	-140	-0.00714286
emMD79	KKO97691.1	amidohydrolase	Trichoderma harzianum		1779	-8.2	-216.951	-0.00460933
emMD08	XP_014544920.1	amidohydrolase partial	Metarhizium brunneum ARSEF 3297		6645	-8.1	-820.37	-0.00121896
emMD17	RZR59654.1	amidohydrolase	Pochonia chlamydosporia 123		3174	-8.1	-391.852	-0.00255198
emMD25	KAF3072591.1	Uncharacterized protein CFAM422 005334	Trichoderma lentiforme		2094	-8.1	-258.519	-0.00386819
emMD74	TQN66970.1	hypothetical protein CSHISOI 08516	Colletotrichum shisoi		14963	-8	-1870.38	-0.000534652
emMD01	RZR59261.1	hypothetical protein I1G 00000742	Pochonia chlamydosporia 123		1367	-7.9	-173.038	-0.00577908
emMD39	XP_016601675.1	amidohydrolase	Penicillium expansum	YES	902	-7.9	-114.177	-0.00875831
emMD95	KAE8553901.1	hypothetical protein EYB25 002439	Talaromyces marneffei		2817	-7.9	-356.582	-0.0028044
emMD38	XP_016594927.1	amidohydrolase	Penicillium expansum	YES	1746	-7.8	-223.846	-0.00446735
emMD54	XP_026623319.1	hypothetical protein BDQ94DRAFT 148814	Aspergillus welwitschiae	YES	978	-7.6	-128.684	-0.00777096
emMD52	EXF80296.1	amidohydrolase	Colletotrichum fioriniae PJ7		1853	-7.4	-250.405	-0.00399352
emMD56	OQD62418.1	hypothetical protein PENPOL c012G10666	Penicillium polonicum	YES	1687	-7.4	-227.973	-0.00438648
emMD59	RZR62254.1	amidohydrolase	Pochonia chlamydosporia 123		927	-7.4	-125.27	-0.00798274
emMD45	KXH25543.1	amidohydrolase	Colletotrichum nymphaeae SA-01		1856	-7.3	-254.247	-0.00393319
emMD24	KAF7527360.1	hypothetical protein PCG10 002763	Penicillium crustosum	YES	1157	-7.2	-160.694	-0.00622299
emMD82	XP_007828835.1	hypothetical protein PFICI 02063	Pestalotiopsis fici W106-1		1081	-7.2	-150.139	-0.0066605
emMD12	XP_033662790.1	uncharacterized protein M409DRAFT 69432	Zasmidium cellare ATCC 36951		10777	-7	-1539.57	-0.000649531
emMD43	XP_028483726.1	hypothetical protein C8Q69DRAFT 472571	Byssochlamys spectabilis	YES	646	-7	-92.2857	-0.0108359
emMD61	KKY28590.1	putative amidohydrolase	Phaeomoniella chlamydospora		933	-6.7	-139.254	-0.00718114
