# Supplementary material for: Systematic Structure-Based Search for Ochratoxin-Degrading Enzymes in Proteomes from Filamentous Fungi
Source: Biomolecules. 2021 Jul 16;11(7):1040. doi: 10.3390/biom11071040 (PMC8301969; doi:10.3390/biom11071040)
Supplement: Supplementary file 1 [file biomolecules-11-01040-s001.zip › Table S3.xlsx]

## Sheet: Residue contribution to Binding
Aminoacid	Residue number	MM Energy	MM dev/error	Polar Energy	Polar Energy dev/error	Apolar Energy	Apolar Energy dev/error	Total Energy	Total Energy dev/error
PRO-440	44	0.0047	0.0002	0.0112	0.0008	0	0	0.0159	0.0008
ASP-45	45	-0.0101	0.0009	0.0091	0.0007	0	0	-0.001	0.0006
GLU-46	46	0.0132	0.0029	-0.0118	0.0005	0	0	0.0014	0.0028
ALA-47	47	0.0015	0.0001	-0.0087	0.0002	0	0	-0.0072	0.0002
VAL-49	49	-0.0005	0.0001	0.0096	0.0001	0	0	0.0091	0.0001
THR-50	50	-0.0008	0.0001	-0.0008	0.0005	0	0	-0.0016	0.0004
ILE-51	51	0.0006	0.0001	0.0019	0.0001	0	0	0.0024	0.0001
ILE-52	52	-0.0034	0.0001	0.0088	0.0002	0	0	0.0055	0.0002
TYR-53	53	0.0035	0.0001	-0.0149	0.0003	0	0	-0.0113	0.0002
ALA-54	54	-0.0061	0.0001	0.0198	0.0002	0	0	0.0137	0.0002
GLY-55	55	-0.0046	0.0001	0.0115	0.0002	0	0	0.0068	0.0002
LEU-56	56	0.0017	0.0001	-0.0142	0.0003	0	0	-0.0126	0.0002
LEU-57	57	-0.0019	0.0001	0.0225	0.0003	0	0	0.0206	0.0003
ILE-58	58	-0.001	0.0001	-0.0156	0.0005	0	0	-0.0167	0.0004
PRO-59	59	0.0044	0.0002	-0.0527	0.0008	0	0	-0.0483	0.0007
GLY-60	60	0.0003	0.0003	-0.0249	0.0012	0	0	-0.0246	0.0009
ASP-61	61	0.2241	0.0042	-0.3978	0.0047	0	0	-0.1739	0.0054
GLY-62	62	0.01	0.0002	-0.0678	0.0007	0	0	-0.0578	0.0007
GLU-63	63	0.1858	0.0025	-0.1007	0.0012	0	0	0.0853	0.0026
PRO-64	64	-0.0097	0.0002	0.0468	0.0005	0	0	0.037	0.0004
LEU-65	65	0.006	0.0001	-0.0192	0.0002	0	0	-0.0133	0.0002
ARG-66	66	-0.2263	0.003	0.198	0.0019	0	0	-0.0284	0.003
ASN-67	67	-0.0025	0.0002	0.01	0.0006	0	0	0.0074	0.0004
ALA-68	68	0.0005	0.0001	0.0043	0.0002	0	0	0.0048	0.0002
ALA-69	69	0.0009	0.0001	-0.0023	0.0002	0	0	-0.0014	0.0002
LEU-70	70	-0.0013	0.0001	0.0132	0.0002	0	0	0.0119	0.0002
VAL-71	71	0.0023	0.0001	-0.0152	0.0002	0	0	-0.0129	0.0002
ILE-72	72	-0.0023	0.0001	0.0208	0.0003	0	0	0.0186	0.0002
SER-73	73	-0.0046	0.0001	0.0122	0.0003	0	0	0.0076	0.0002
ASP-74	74	0.0387	0.0043	-0.1102	0.0016	0	0	-0.0713	0.004
ILE-76	76	-0.0015	0.0001	0.022	0.0003	0	0	0.0205	0.0003
ILE-77	77	-0.0071	0.0001	0.0208	0.0003	0	0	0.0138	0.0002
ALA-78	78	-0.002	0.0001	0.009	0.0001	0	0	0.007	0.0001
PHE-79	79	0.0017	0.0001	-0.0148	0.0002	0	0	-0.0131	0.0002
VAL-80	80	-0.0045	0.0001	0.0185	0.0002	0	0	0.014	0.0002
GLY-81	81	0.0024	0.0001	-0.0147	0.0002	0	0	-0.0123	0.0002
SER-82	82	-0.0031	0.0001	-0.0067	0.0003	0	0	-0.0098	0.0002
GLU-83	83	0.1313	0.0025	-0.0934	0.001	0	0	0.0377	0.0025
ALA-84	84	-0.0018	0	0.0015	0.0001	0	0	-0.0003	0.0001
ASP-85	85	0.079	0.002	-0.0294	0.0003	0	0	0.0496	0.0019
ILE-86	86	-0.0027	0.0001	0.0087	0.0001	0	0	0.006	0.0001
PRO-87	87	0.0036	0.0001	-0.0095	0.0001	0	0	-0.0059	0.0001
TYR-90	90	0.0015	0.0001	-0.0027	0.0002	0	0	-0.0012	0.0001
LEU-91	91	0.0005	0.0001	-0.0009	0.0001	0	0	-0.0004	0.0001
ARG-92	92	-0.0638	0.0021	0.0137	0.0003	0	0	-0.0502	0.0019
SER-93	93	-0.002	0.0001	0.0035	0.0001	0	0	0.0016	0.0001
THR-94	94	-0.0014	0.0001	0.0066	0.0002	0	0	0.0052	0.0001
GLN-95	95	0.0001	0.0002	0.0058	0.0003	0	0	0.0058	0.0003
SER-96	96	-0.0004	0.0001	-0.0023	0.0004	0	0	-0.0027	0.0004
THR-97	97	-0.0011	0.0001	0.0093	0.0003	0	0	0.0082	0.0002
HSD-98	98	-0.0098	0.0002	0.0044	0.0005	0	0	-0.0054	0.0004
ARG-99	99	-0.1361	0.0028	0.0939	0.0009	0	0	-0.0422	0.0028
VAL-100	100	-0.0079	0.0002	0.0245	0.0003	0	0	0.0167	0.0003
PRO-101	101	-0.0056	0.0002	-0.0001	0.0002	0	0	-0.0056	0.0002
VAL-102	102	-0.0013	0.0001	-0.0013	0.0003	0	0	-0.0026	0.0003
LEU-103	103	-0.0003	0.0002	0.019	0.0004	0	0	0.0187	0.0003
MET-104	104	-0.0077	0.0003	0.0317	0.0009	0	0	0.0241	0.0009
PRO-105	105	0.021	0.0004	-0.0469	0.0011	0	0	-0.0258	0.001
GLY-106	106	-0.0048	0.0006	0.0093	0.001	0	0	0.0045	0.001
LEU-107	107	-0.0323	0.0005	-0.0413	0.0016	0	0	-0.0736	0.0014
TRP-108	108	0.012	0.0006	0.0064	0.0026	0	0	0.0184	0.0027
ASP-109	109	1.829	0.0302	-4.9039	0.102	0	0	-3.068	0.1122
CYS-110	110	-0.1171	0.0017	0.3425	0.01	0	0	0.2259	0.0107
HSD-111	111	0.8098	0.0319	4.0193	0.0912	-0.0073	0.001	4.8206	0.1084
MET-112	112	-0.7907	0.0178	2.486	0.0297	0	0	1.6956	0.0394
HSD-113	113	-5.5453	0.1407	19.8402	0.1639	-1.029	0.0089	13.261	0.2597
PHE-114	114	-2.1097	0.072	0.3417	0.0312	-0.0106	0.0013	-1.7808	0.0572
GLY-115	115	-2.9586	0.0782	6.708	0.1049	-0.4354	0.0056	3.3112	0.0662
GLY-116	116	-0.7045	0.0228	1.8051	0.0515	-0.0047	0.0007	1.0975	0.0475
ASP-117	117	1.8798	0.1427	-18.2951	0.5106	-0.2967	0.0084	-16.725	0.4606
ASP-118	118	1.1085	0.0387	-9.3567	0.1226	-0.0041	0.0008	-8.2555	0.0932
ASP-119	119	3.1396	0.0829	-19.3505	0.4939	-0.0637	0.0061	-16.2823	0.4437
TYR-120	120	-0.2569	0.0118	-1.0719	0.0346	-0.0003	0.0002	-1.3261	0.0397
TYR-121	121	-0.1634	0.0267	-2.4776	0.0641	-0.0109	0.0016	-2.6523	0.0816
ASN-122	122	-1.2363	0.0381	1.1341	0.1429	-0.0716	0.0037	-0.1807	0.1268
ASP-123	123	-2.2782	0.0672	-11.5676	0.1419	-0.0419	0.0028	-13.8887	0.1167
TYR-124	124	-7.3945	0.1086	1.1773	0.0533	-0.7051	0.0094	-6.929	0.1064
THR-125	125	-0.1206	0.0073	0.9138	0.0178	0	0	0.7934	0.0213
SER-126	126	-0.4177	0.0128	1.0075	0.049	-0.0237	0.0027	0.5649	0.0452
GLY-127	127	0.2632	0.0056	1.9211	0.0417	-0.0243	0.0025	2.1589	0.0389
LEU-128	128	0.0318	0.0037	0.5507	0.0079	0	0	0.5828	0.0094
ALA-129	129	0.0571	0.0019	0.6099	0.0067	0	0	0.667	0.0069
THR-130	130	-0.0437	0.0028	0.0359	0.0177	0	0	-0.0083	0.0184
HSD-131	131	0.0487	0.0027	-0.3214	0.0129	0	0	-0.2729	0.0137
PRO-132	132	0.013	0.0024	-0.0996	0.0208	0	0	-0.0859	0.0196
ALA-133	133	-0.011	0.0018	-0.151	0.0125	0	0	-0.1612	0.0112
SER-134	134	0.0769	0.0024	0.0589	0.0117	0	0	0.1355	0.011
SER-135	135	0.068	0.0048	0.3678	0.0186	0	0	0.436	0.0189
GLY-136	136	0.0684	0.0015	-0.3285	0.0061	0	0	-0.2599	0.0061
ALA-137	137	0.0315	0.0009	-0.1084	0.0032	0	0	-0.077	0.0032
ARG-138	138	-0.893	0.0425	6.6289	0.1282	0	0	5.7378	0.1219
LEU-139	139	0.0176	0.0025	0.2889	0.0069	0	0	0.3063	0.0062
ALA-140	140	0.0437	0.0007	-0.1022	0.0036	0	0	-0.0585	0.0038
ARG-141	141	-0.9016	0.0281	3.2651	0.083	0	0	2.3615	0.073
GLY-142	142	-0.0208	0.0023	0.3804	0.0055	0	0	0.3596	0.0053
CYS-143	143	0.0223	0.0013	0.0201	0.0039	0	0	0.0425	0.0042
TRP-144	144	0.0153	0.0006	0.0134	0.0017	0	0	0.0287	0.0018
GLU-145	145	1.0725	0.0312	-3.0197	0.065	0	0	-1.9476	0.0471
ALA-146	146	-0.0188	0.0012	0.2921	0.0031	0	0	0.2734	0.0026
LEU-147	147	0.0059	0.0006	0.054	0.0011	0	0	0.0598	0.0011
GLN-148	148	-0.0384	0.0015	0.2857	0.0053	0	0	0.2473	0.005
ASN-149	149	-0.0581	0.0028	0.403	0.0143	0	0	0.344	0.0124
GLY-150	150	-0.0069	0.0007	0.053	0.0016	0	0	0.046	0.0013
TYR-151	151	-0.0701	0.0014	0.1044	0.0082	0	0	0.0344	0.0077
THR-152	152	-0.0136	0.0005	-0.0135	0.002	0	0	-0.0271	0.0019
SER-153	153	0.017	0.0005	0.0138	0.0022	0	0	0.0307	0.0021
TYR-154	154	-0.1503	0.0021	0.0808	0.0147	0	0	-0.0691	0.014
ARG-155	155	-0.5668	0.0311	-1.3059	0.1504	0	0	-1.877	0.1739
ASP-156	156	-2.6861	0.0529	-8.1311	0.1787	0	0	-10.8192	0.1872
LEU-157	157	-1.6896	0.0286	1.4338	0.0412	-0.0051	0.0009	-0.2617	0.0417
ALA-158	158	-4.9514	0.0463	3.5645	0.0654	-0.431	0.0072	-1.821	0.0727
GLY-159	159	-1.2739	0.0331	1.9574	0.0547	-0.0521	0.0035	0.6318	0.0353
TYR-160	160	-1.0802	0.0447	2.4755	0.0954	-0.1065	0.0062	1.2928	0.0815
GLY-161	161	0.0828	0.0023	0.2622	0.0098	0	0	0.3451	0.0101
CYS-162	162	0.1116	0.0028	0.2596	0.0053	0	0	0.371	0.007
GLU-163	163	-1.3516	0.02	-2.9444	0.0511	0	0	-4.2958	0.0607
VAL-164	164	0.063	0.0019	0.5566	0.0078	0	0	0.6193	0.008
ALA-165	165	-0.0341	0.0016	0.1873	0.0044	0	0	0.1529	0.0049
ALA-167	167	0.005	0.0007	0.0479	0.0026	0	0	0.053	0.0023
ILE-168	168	0.0047	0.0006	0.194	0.0049	0	0	0.1989	0.0047
ASN-169	169	0.0249	0.0017	0.0025	0.0054	0	0	0.0274	0.0061
ASP-170	170	-0.2261	0.0079	-0.5162	0.0086	0	0	-0.7423	0.0119
GLY-171	171	0.0046	0.0004	0.0716	0.002	0	0	0.0762	0.0021
THR-172	172	0.0134	0.0006	0.0855	0.0021	0	0	0.0991	0.0022
ILE-173	173	-0.0211	0.001	0.1416	0.0024	0	0	0.1205	0.0022
VAL-174	174	0.0063	0.0009	-0.1692	0.0036	0	0	-0.1627	0.0033
GLY-175	175	-0.0354	0.0011	0.2361	0.0039	0	0	0.2006	0.0034
PRO-176	176	-0.0751	0.0007	0.0826	0.0029	0	0	0.0077	0.0028
ASN-177	177	0.0156	0.0014	-0.1439	0.009	0	0	-0.1285	0.0092
VAL-178	178	-0.0486	0.0014	0.1409	0.0078	0	0	0.0926	0.0078
TYR-179	179	-0.0322	0.0022	0.0359	0.0114	0	0	0.0041	0.0131
SER-180	180	0.0358	0.0038	0.3031	0.0159	0	0	0.3398	0.0183
SER-181	181	-0.0784	0.0035	-0.1279	0.0217	0	0	-0.2072	0.0208
GLY-182	182	-0.3119	0.0026	0.0324	0.0189	0	0	-0.2795	0.0194
ALA-183	183	0.201	0.002	0.495	0.0127	0	0	0.6954	0.0139
ALA-184	184	-0.2688	0.0071	-1.182	0.037	-0.0008	0.0004	-1.4526	0.043
LEU-185	185	-0.0871	0.0026	0.8557	0.0304	0	0	0.7692	0.0295
SER-186	186	-0.0669	0.0026	0.0476	0.0116	0	0	-0.019	0.0122
GLN-187	187	-0.0484	0.0028	-0.1705	0.0078	0	0	-0.219	0.0087
THR-188	188	0.031	0.0016	0.1294	0.0066	0	0	0.1599	0.0079
ALA-189	189	0.0917	0.0012	0.0204	0.0054	0	0	0.1119	0.0053
GLY-190	190	-0.1089	0.0037	-0.8555	0.0116	0	0	-0.964	0.0118
HSD-191	191	-5.6803	0.1415	13.5343	0.2276	-0.3329	0.0108	7.5183	0.136
GLY-192	192	-0.7188	0.0195	-0.4304	0.015	-0.0181	0.0017	-1.1682	0.0248
ASP-193	193	-1.7638	0.0238	-6.5061	0.072	0	0	-8.2671	0.0701
ILE-194	194	-0.0643	0.0041	0.3628	0.0063	0	0	0.2986	0.0075
PHE-195	195	-0.0433	0.0029	0.489	0.0067	0	0	0.4456	0.0063
ALA-196	196	0.0679	0.0019	0.4738	0.007	0	0	0.5415	0.0073
LEU-197	197	-0.0027	0.0012	-0.077	0.0045	0	0	-0.0799	0.0053
PRO-198	198	-0.0969	0.0007	-0.3578	0.0043	0	0	-0.455	0.0045
ALA-199	199	-0.0687	0.0006	-0.2242	0.0032	0	0	-0.2929	0.0035
GLY-200	200	-0.0461	0.0005	-0.1242	0.002	0	0	-0.1703	0.0023
GLU-201	201	-0.968	0.0078	-1.0212	0.0204	0	0	-1.9893	0.0234
VAL-202	202	-0.0778	0.0014	-0.0382	0.0032	0	0	-0.116	0.0039
LEU-203	203	-0.0639	0.0008	-0.141	0.0024	0	0	-0.2052	0.003
GLY-204	204	-0.0181	0.0007	0.0158	0.002	0	0	-0.0023	0.0025
SER-205	205	0.0129	0.0021	0.2315	0.0062	0	0	0.2443	0.0077
TYR-206	206	-0.169	0.0135	0.0913	0.0333	-0.0065	0.0013	-0.0857	0.0355
GLY-207	207	-0.09	0.0009	-0.1257	0.0032	0	0	-0.2157	0.0038
VAL-208	208	0.0091	0.0005	0.0608	0.0013	0	0	0.0698	0.0015
MET-209	209	-0.0525	0.0007	-0.0952	0.0026	0	0	-0.1475	0.0031
ASN-210	210	-0.0339	0.001	-0.063	0.0022	0	0	-0.097	0.003
PRO-211	211	0.0209	0.0006	0.0481	0.0013	0	0	0.069	0.0018
ARG-212	212	0.883	0.0093	0.6661	0.0265	0	0	1.5499	0.0353
PRO-213	213	-0.042	0.0006	-0.0558	0.0013	0	0	-0.0977	0.0015
GLY-214	214	-0.0223	0.0008	-0.0452	0.002	0	0	-0.0675	0.0027
TYR-215	215	-0.0208	0.0022	-0.01	0.0062	0	0	-0.031	0.0083
TRP-216	216	0.0193	0.0013	-0.0371	0.0031	0	0	-0.0177	0.004
GLY-217	217	0.0026	0.0017	-0.0771	0.0048	0	0	-0.0746	0.0061
ALA-218	218	-0.1152	0.0019	-0.3679	0.0067	0	0	-0.4836	0.0072
GLY-219	219	0.1651	0.0034	0.592	0.0152	0	0	0.7571	0.0176
PRO-220	220	-1.1342	0.0305	1.581	0.036	-0.1439	0.0058	0.3049	0.0316
LEU-221	221	-1.9064	0.0645	0.0789	0.0116	-0.1801	0.0079	-2.0047	0.0697
CYS-222	222	-0.0867	0.0018	0.0297	0.0067	0	0	-0.0569	0.0073
ILE-223	223	-0.0477	0.0012	0.0656	0.0022	0	0	0.0178	0.0029
ALA-224	224	-0.0372	0.0006	-0.129	0.0034	0	0	-0.1663	0.0035
ASP-225	225	-0.6606	0.0081	-1.1265	0.0208	0	0	-1.7868	0.022
GLY-226	226	-0.0452	0.0003	-0.0798	0.0018	0	0	-0.1249	0.0018
VAL-227	227	-0.0274	0.0003	-0.0585	0.0014	0	0	-0.0858	0.0013
GLU-228	228	-0.447	0.0038	-0.3843	0.0054	0	0	-0.8316	0.0064
GLU-229	229	-0.7542	0.0056	-1.1149	0.0212	0	0	-1.8702	0.0238
VAL-230	230	-0.0329	0.0004	0.0045	0.0025	0	0	-0.0284	0.0025
ARG-231	231	0.3519	0.0046	0.5364	0.0051	0	0	0.8883	0.0051
ARG-232	232	0.5508	0.004	0.5145	0.007	0	0	1.0652	0.0074
ALA-233	233	-0.0237	0.0007	-0.0111	0.0022	0	0	-0.0347	0.0022
VAL-234	234	-0.0406	0.0005	-0.0496	0.002	0	0	-0.0903	0.002
ARG-235	235	0.4444	0.005	0.6503	0.0065	0	0	1.0948	0.0066
LEU-236	236	0.0104	0.0007	-0.0687	0.0025	0	0	-0.0583	0.0029
GLN-237	237	-0.0692	0.0022	-0.4039	0.0076	0	0	-0.4725	0.0087
ILE-238	238	-0.0082	0.0005	-0.0741	0.0017	0	0	-0.0823	0.0018
ARG-239	239	0.6479	0.0084	0.7976	0.0256	0	0	1.4459	0.0319
ARG-240	240	1.8026	0.0178	3.9633	0.0621	0	0	5.7632	0.0712
GLY-241	241	0.0378	0.0006	0.0415	0.0048	0	0	0.0792	0.0047
ALA-242	242	0.1188	0.0011	-0.0511	0.0102	0	0	0.0677	0.0106
VAL-244	244	-0.1682	0.0022	0.8455	0.04	0	0	0.677	0.0393
ILE-245	245	0.053	0.0013	-0.6614	0.032	0	0	-0.6104	0.0323
VAL-247	247	0.1205	0.0021	1.5543	0.0615	0	0	1.6753	0.0622
MET-248	248	-1.3645	0.0487	0.0167	0.0465	-0.0894	0.0042	-1.4346	0.0624
ALA-249	249	-0.0558	0.0018	-0.2285	0.0206	0	0	-0.2852	0.0211
SER-250	250	-0.0564	0.0046	0.6102	0.0289	0	0	0.5545	0.0299
GLY-251	251	-0.1225	0.0115	1.8233	0.0449	0	0	1.6988	0.0359
GLY-252	252	-1.4671	0.0787	1.7863	0.1624	-0.0089	0.0013	0.3059	0.0989
VAL-253	253	-5.304	0.0961	5.1813	0.1391	-0.5315	0.0063	-0.6589	0.199
MET-254	254	-15.5156	0.1156	3.5854	0.1217	-1.2339	0.0122	-13.1607	0.1785
SER-255	255	-0.3294	0.0085	0.1656	0.0289	0	0	-0.1652	0.0263
ARG-256	256	-0.4021	0.0341	8.0659	0.0721	0	0	7.6654	0.0651
ASP-257	257	-0.1756	0.0253	-4.7262	0.0373	0	0	-4.9047	0.0387
ASP-258	258	0.8835	0.0535	-9.4196	0.1096	0	0	-8.5377	0.0942
ASN-259	259	0.0577	0.0022	-0.2544	0.0098	0	0	-0.1966	0.0096
PRO-260	260	-0.042	0.0024	-0.022	0.0081	0	0	-0.0643	0.0075
ASN-261	261	0.012	0.0013	0.015	0.009	0	0	0.0268	0.0078
PHE-262	262	0.0132	0.0012	-0.049	0.0073	0	0	-0.0352	0.0075
ALA-263	263	-0.0008	0.0009	-0.0532	0.005	0	0	-0.0539	0.0048
GLN-264	264	-0.0239	0.0051	0.379	0.0208	0	0	0.3553	0.019
PHE-265	265	0.0326	0.0008	0.0623	0.0045	0	0	0.095	0.004
SER-266	266	-0.009	0.0004	0.0004	0.0034	0	0	-0.0086	0.0033
PRO-267	267	-0.0099	0.0003	-0.0395	0.0017	0	0	-0.0494	0.0018
GLU-268	268	-0.2062	0.0041	-0.1881	0.0065	0	0	-0.3942	0.0082
GLU-269	269	-0.3988	0.0065	-0.9326	0.0279	0	0	-1.3299	0.0308
LEU-270	270	0.0014	0.0003	-0.0405	0.0032	0	0	-0.0391	0.0032
VAL-272	272	0.0082	0.0004	-0.0299	0.0021	0	0	-0.0216	0.0021
ILE-273	273	0.0015	0.0005	-0.0488	0.0049	0	0	-0.0471	0.0048
VAL-274	274	-0.0108	0.0003	-0.0408	0.0025	0	0	-0.0517	0.0024
GLU-275	275	-0.1991	0.0052	-0.3437	0.0041	0	0	-0.5427	0.0055
GLU-276	276	-0.4011	0.0055	-0.8583	0.0088	0	0	-1.2595	0.0081
ALA-277	277	0.0023	0.0004	-0.0209	0.0022	0	0	-0.0185	0.0022
ALA-278	278	0.0008	0.0002	0.0138	0.0009	0	0	0.0146	0.0009
ARG-279	279	0.2582	0.0046	0.2612	0.0045	0	0	0.5194	0.0057
GLN-280	280	0.007	0.0007	-0.0295	0.0027	0	0	-0.0224	0.0029
ASN-281	281	-0.001	0.0008	-0.0179	0.0013	0	0	-0.019	0.0015
ARG-282	282	0.4075	0.009	1.1033	0.0201	0	0	1.511	0.02
ILE-283	283	-0.0369	0.0008	0.1801	0.0086	0	0	0.1433	0.009
VAL-284	284	0.0505	0.0006	-0.1704	0.0072	0	0	-0.1196	0.0072
SER-285	285	-0.0847	0.0023	1.1708	0.0341	0	0	1.0839	0.0344
ALA-286	286	0.0143	0.0013	0.0791	0.0173	0	0	0.0936	0.0179
HSD-287	287	-1.5375	0.0981	-2.3161	0.1113	-0.0897	0.0054	-3.9501	0.1248
VAL-288	288	0.0119	0.0063	0.6108	0.039	0	0	0.6212	0.035
HSD-289	289	0.0805	0.0126	0.4638	0.0626	-0.0012	0.0008	0.5437	0.0537
GLY-290	290	0.0119	0.0011	0.097	0.0107	0	0	0.1094	0.0102
ALA-292	292	-0.0082	0.0005	0.0267	0.0045	0	0	0.0188	0.0045
GLY-293	293	-0.0239	0.0005	0.1701	0.0064	0	0	0.1466	0.0065
ILE-294	294	-0.0102	0.0003	0.0331	0.003	0	0	0.0228	0.0029
MET-295	295	-0.0095	0.0004	-0.0093	0.0023	0	0	-0.0188	0.0021
ALA-296	296	-0.024	0.0007	-0.0168	0.004	0	0	-0.0409	0.0038
ALA-297	297	-0.0073	0.0004	-0.0619	0.0019	0	0	-0.0692	0.002
ILE-298	298	0.0049	0.0003	-0.0078	0.0014	0	0	-0.0029	0.0013
ALA-300	300	-0.0064	0.0003	0.0137	0.0021	0	0	0.0073	0.0022
GLY-301	301	-0.0147	0.0006	-0.0575	0.0025	0	0	-0.0723	0.0021
CYS-302	302	0.0018	0.0007	-0.1807	0.0076	0	0	-0.179	0.0074
SER-304	304	-0.022	0.0011	0.1089	0.0101	0	0	0.0867	0.0108
LEU-305	305	0.0118	0.0009	-0.0726	0.006	0	0	-0.061	0.0063
GLU-306	306	0.9985	0.0424	6.3009	0.2613	0	0	7.3022	0.2929
HSD-307	307	-0.7513	0.052	0.9704	0.107	-0.0466	0.0038	0.1754	0.0691
VAL-308	308	-0.002	0.0013	0.349	0.0103	0	0	0.3468	0.0097
SER-309	309	0.0006	0.002	-0.0225	0.0107	0	0	-0.0217	0.0108
TYR-310	310	-0.0029	0.0008	-0.0243	0.005	0	0	-0.027	0.0048
ALA-311	311	0.0028	0.0003	-0.0453	0.0023	0	0	-0.0425	0.0023
ASP-312	312	0.2388	0.0051	-0.4442	0.0065	0	0	-0.2054	0.0061
GLU-313	313	0.2205	0.0035	-0.203	0.0028	0	0	0.0172	0.0035
GLU-314	314	0.1483	0.0045	-0.1893	0.0028	0	0	-0.0409	0.0041
VAL-315	315	-0.0064	0.0003	0.0097	0.0007	0	0	0.0033	0.0007
TRP-316	316	-0.0159	0.0003	-0.1154	0.0049	0	0	-0.1313	0.005
GLU-317	317	0.1752	0.0037	-0.2333	0.0031	0	0	-0.058	0.0034
LEU-318	318	-0.0058	0.0002	-0.0305	0.001	0	0	-0.0362	0.001
MET-319	319	0.0008	0.0004	-0.0149	0.002	0	0	-0.0141	0.0021
GLU-321	321	0.1801	0.0044	-0.3192	0.0059	0	0	-0.1388	0.0057
GLY-323	323	-0.0098	0.0002	0.0049	0.0017	0	0	-0.0048	0.0015
ILE-324	324	0.0054	0.0005	0.0296	0.0027	0	0	0.0349	0.0028
LEU-325	325	-0.0015	0.0007	0.231	0.0059	0	0	0.2293	0.0061
TYR-326	326	-0.0471	0.0014	-0.2271	0.008	0	0	-0.2742	0.0089
VAL-327	327	-0.0294	0.0015	0.4005	0.0117	0	0	0.3708	0.0122
ALA-328	328	-0.0273	0.0024	0.528	0.0161	0	0	0.5009	0.0167
THR-329	329	-0.4306	0.0125	1.2869	0.0499	-0.0037	0.0008	0.8544	0.0508
ARG-330	330	-0.901	0.0075	3.9121	0.0432	0	0	3.009	0.0415
SER-331	331	-0.4161	0.0107	-0.3083	0.0212	0	0	-0.7252	0.0171
VAL-332	332	-5.7205	0.0704	1.6741	0.0696	-0.6269	0.0137	-4.6735	0.0898
ILE-333	333	-1.3136	0.0515	-0.4802	0.0178	-0.0411	0.0035	-1.8338	0.042
GLU-334	334	0.5652	0.0123	-4.6149	0.0286	0	0	-4.0505	0.0294
ILE-335	335	-2.143	0.061	1.8124	0.0334	-0.3028	0.0105	-0.6327	0.0455
PHE-336	336	-2.4882	0.0459	1.6455	0.0207	-0.2154	0.0063	-1.0589	0.0502
LEU-337	337	-0.1403	0.0017	0.3333	0.0057	0	0	0.1929	0.0055
ALA-338	338	-0.0845	0.0022	0.6412	0.0072	0	0	0.5569	0.0064
SER-339	339	-0.0555	0.0032	0.9484	0.0175	-0.0007	0.0004	0.8924	0.017
ASN-340	340	-0.0284	0.0012	0.233	0.0094	0	0	0.2047	0.009
GLY-341	341	-0.0658	0.0025	0.3685	0.0144	0	0	0.3029	0.0147
GLU-342	342	0.2225	0.0164	-3.5364	0.056	-0.0015	0.0005	-3.3158	0.0617
GLY-343	343	-1.3356	0.0417	0.1601	0.0644	-0.2127	0.0076	-1.3892	0.0352
LEU-344	344	-2.7179	0.0534	1.1412	0.029	-0.2595	0.0061	-1.835	0.0566
VAL-345	345	-0.1525	0.0043	0.0817	0.0151	0	0	-0.0706	0.0142
GLU-347	347	0.0214	0.0181	-1.9293	0.0355	0	0	-1.9091	0.0311
SER-348	348	-0.0356	0.0045	-0.3807	0.0288	0	0	-0.4153	0.0251
TRP-349	349	-0.0318	0.0024	0.115	0.0199	0	0	0.0829	0.0182
ALA-350	350	-0.0646	0.0018	0.2758	0.0117	0	0	0.2106	0.0109
LEU-352	352	-0.0346	0.0018	-0.3911	0.014	0	0	-0.4256	0.0139
GLN-353	353	-0.0037	0.001	-0.2834	0.0111	0	0	-0.287	0.0112
ALA-354	354	-0.0136	0.0012	-0.0087	0.0071	0	0	-0.0224	0.0073
LEU-355	355	-1.0657	0.0325	0.7114	0.0128	-0.0877	0.004	-0.4438	0.0332
ALA-356	356	-0.0222	0.0018	-0.0386	0.0064	0	0	-0.0606	0.0073
ASP-357	357	0.3424	0.0081	-1.7365	0.0134	0	0	-1.394	0.0138
SER-358	358	0.0085	0.0025	0.408	0.0156	0	0	0.4165	0.0149
HSD-359	359	-0.604	0.0473	1.9051	0.1582	-0.0247	0.0025	1.2746	0.1096
LEU-360	360	-0.0096	0.0006	0.0593	0.0026	0	0	0.0497	0.0024
ALA-362	362	-0.0185	0.0007	-0.0663	0.007	0	0	-0.0849	0.0071
TYR-363	363	-0.0795	0.001	0.0223	0.0095	0	0	-0.0571	0.0098
GLN-364	364	0.0205	0.0011	-0.0611	0.0076	0	0	-0.0412	0.0066
GLY-365	365	-0.0085	0.0003	-0.0134	0.0016	0	0	-0.0219	0.0016
ALA-366	366	-0.0274	0.0005	-0.1018	0.0048	0	0	-0.1291	0.0051
ILE-367	367	-0.0215	0.0003	0.0007	0.0022	0	0	-0.0208	0.0023
ALA-369	369	-0.0068	0.0002	0.0552	0.001	0	0	0.0484	0.0009
GLY-370	370	-0.0142	0.0002	0.0335	0.0017	0	0	0.0193	0.0018
VAL-371	371	0.002	0.0004	-0.0676	0.002	0	0	-0.0657	0.0021
THR-372	372	0.007	0.0006	0.1453	0.004	0	0	0.1524	0.0042
ILE-373	373	-0.038	0.0006	-0.07	0.0039	0	0	-0.1079	0.0042
ALA-374	374	0.0298	0.0008	0.1034	0.005	0	0	0.1329	0.0056
LEU-375	375	-0.0436	0.0015	0.1996	0.0066	0	0	0.1559	0.0073
GLY-376	376	-0.0726	0.0029	0.3146	0.0112	0	0	0.2422	0.0119
THR-377	377	-0.3487	0.0084	-0.4749	0.026	0	0	-0.822	0.027
ASP-378	378	7.895	0.3576	38.161	0.6229	-0.4252	0.01	45.6638	0.8531
THR-379	379	-3.3259	0.1469	5.8092	0.2301	-0.1778	0.0081	2.3087	0.1101
ALA-380	380	-1.3005	0.0498	2.1573	0.0662	-0.1648	0.0079	0.6943	0.0295
PRO-381	381	0.0821	0.006	-0.7984	0.0257	0	0	-0.7167	0.0228
GLY-382	382	-0.066	0.0027	0.3724	0.0092	0	0	0.3065	0.0072
GLY-383	383	-0.2966	0.0111	0.7236	0.03	0	0	0.4282	0.0216
PRO-384	384	0.0773	0.0074	-0.7569	0.0254	0	0	-0.6795	0.019
THR-385	385	-0.0815	0.0026	0.2235	0.0103	0	0	0.1424	0.0087
ALA-386	386	-0.0347	0.0012	0.1567	0.0021	0	0	0.1219	0.002
LEU-387	387	-0.1612	0.0028	0.4652	0.0068	0	0	0.3042	0.0055
GLU-388	388	1.4098	0.0151	-3.9829	0.0941	0	0	-2.5787	0.0974
LEU-389	389	-0.0389	0.001	0.1347	0.0024	0	0	0.0957	0.002
GLN-390	390	-0.0722	0.0018	0.2282	0.0056	0	0	0.1558	0.0046
PHE-391	391	-0.1043	0.0011	0.2405	0.0051	0	0	0.1361	0.005
ALA-392	392	-0.037	0.0006	0.0794	0.003	0	0	0.0426	0.0029
VAL-393	393	-0.0223	0.0005	0.0872	0.0014	0	0	0.0648	0.0013
GLU-394	394	0.5566	0.0067	-1.08	0.0151	0	0	-0.5241	0.0146
ARG-395	395	-0.7454	0.0089	2.8727	0.0224	0	0	2.1275	0.0216
GLY-396	396	-0.0289	0.0004	0.0404	0.0027	0	0	0.0115	0.0028
GLY-397	397	-0.0176	0.0002	0.0895	0.0009	0	0	0.0719	0.0009
MET-398	398	-0.0006	0.0006	0.0214	0.0015	0	0	0.0207	0.0015
THR-399	399	0.0162	0.0003	-0.1211	0.002	0	0	-0.105	0.0019
PRO-400	400	0.0118	0.0003	-0.1005	0.0016	0	0	-0.0887	0.0016
LEU-401	401	0.0118	0.0003	-0.0955	0.0011	0	0	-0.0837	0.0011
GLU-402	402	0.3712	0.0037	-0.8329	0.0068	0	0	-0.4618	0.0073
ALA-403	403	0.009	0.0005	-0.055	0.0019	0	0	-0.0459	0.0021
ILE-404	404	0.0107	0.0004	-0.0773	0.0018	0	0	-0.0666	0.0018
ALA-406	406	-0.0013	0.0003	-0.0549	0.0009	0	0	-0.0563	0.0009
ALA-407	407	-0.0074	0.0007	0.0228	0.0017	0	0	0.0154	0.002
THR-408	408	0.0066	0.0009	-0.0728	0.0032	0	0	-0.0662	0.0033
ALA-409	409	-0.0105	0.0003	-0.0509	0.0009	0	0	-0.0614	0.0008
ASN-410	410	-0.0534	0.0006	0.0969	0.003	0	0	0.0436	0.003
ALA-411	411	-0.0228	0.0008	0.0691	0.0018	0	0	0.0463	0.002
PRO-412	412	-0.0211	0.0004	0.003	0.001	0	0	-0.018	0.001
LEU-413	413	-0.031	0.0003	-0.0814	0.0025	0	0	-0.1122	0.0025
SER-414	414	-0.0577	0.001	0.0761	0.0074	0	0	0.0184	0.0074
VAL-415	415	-0.0299	0.0004	0.1393	0.0017	0	0	0.1094	0.0017
GLY-416	416	-0.0026	0.0004	-0.0342	0.0014	0	0	-0.0368	0.0014
PRO-417	417	-0.0015	0.0003	0.0167	0.0006	0	0	0.0153	0.0007
GLN-418	418	-0.0264	0.0009	-0.024	0.0082	0	0	-0.0505	0.0085
ALA-419	419	-0.0159	0.0004	0.1029	0.0016	0	0	0.087	0.0014
PRO-420	420	0.0134	0.0004	-0.1451	0.0017	0	0	-0.1317	0.0016
LEU-421	421	-0.0026	0.0002	-0.0203	0.0005	0	0	-0.0229	0.0005
THR-422	422	0.0063	0.0003	0.039	0.0018	0	0	0.0454	0.0017
GLY-423	423	0.0041	0.0002	0.0171	0.0008	0	0	0.0212	0.0007
GLN-424	424	-0.0138	0.0004	0.0666	0.002	0	0	0.0528	0.0017
LEU-425	425	-0.0015	0.0001	0.0084	0.0004	0	0	0.0069	0.0003
ARG-426	426	-0.1627	0.0034	0.2927	0.0041	0	0	0.1301	0.0049
GLU-427	427	0.0947	0.0029	-0.1315	0.0013	0	0	-0.0366	0.0029
GLY-428	428	-0.0032	0.0001	-0.0064	0.0002	0	0	-0.0096	0.0002
TYR-429	429	-0.0112	0.0004	0.0826	0.0013	0	0	0.0714	0.0012
GLU-430	430	0.079	0.0065	-0.646	0.0095	0	0	-0.5674	0.0104
ALA-431	431	0.0064	0.0002	-0.0207	0.0004	0	0	-0.0143	0.0004
ASP-432	432	0.2115	0.0081	-1.5617	0.0123	0	0	-1.3498	0.0128
VAL-433	433	-0.0019	0.0002	-0.0262	0.0007	0	0	-0.028	0.0006
ILE-434	434	-0.012	0.0003	0.0459	0.0007	0	0	0.0339	0.0005
ALA-435	435	0.0128	0.0003	-0.0572	0.0009	0	0	-0.0445	0.0007
LEU-436	436	-0.0123	0.0002	0.0192	0.0005	0	0	0.0069	0.0004
GLU-437	437	0.2708	0.0053	-0.1764	0.0021	0	0	0.0943	0.0046
GLU-438	438	0.3581	0.0059	-0.3454	0.0045	0	0	0.0129	0.0059
ASN-439	439	0.0174	0.0002	-0.0609	0.0007	0	0	-0.0435	0.0006
LEU-441	441	0.0035	0.0002	0.016	0.0006	0	0	0.0195	0.0005
GLU-442	442	0.2606	0.0033	-0.1393	0.0015	0	0	0.1213	0.0031
ASP-443	443	0.3722	0.0052	-0.3536	0.0036	0	0	0.0186	0.0052
ILE-444	444	-0.014	0.0003	0.0565	0.001	0	0	0.0424	0.0008
VAL-446	446	0.004	0.0004	0.0317	0.001	0	0	0.0356	0.0009
PHE-447	447	0.0294	0.0009	-0.1238	0.0029	0	0	-0.0943	0.0024
GLN-448	448	0.0318	0.0013	-0.0799	0.005	0	0	-0.0483	0.0047
GLU-449	449	0.5613	0.0122	-0.4092	0.0063	0	0	0.1522	0.011
PRO-450	450	-0.0285	0.0007	0.1337	0.0026	0	0	0.1053	0.0023
ALA-452	452	-0.0183	0.0003	0.0845	0.0016	0	0	0.0662	0.0014
VAL-453	453	-0.0039	0.0003	0.0719	0.0014	0	0	0.068	0.0014
THR-454	454	0.0015	0.0003	-0.0261	0.0014	0	0	-0.0247	0.0012
HSD-455	455	-0.0006	0.0003	0.0373	0.0008	0	0	0.0367	0.0008
VAL-456	456	-0.0103	0.0002	0.078	0.001	0	0	0.0677	0.0009
TRP-457	457	0.0222	0.0004	-0.1337	0.0013	0	0	-0.1115	0.0012
GLY-459	459	0.0102	0.0005	-0.0273	0.0024	0	0	-0.017	0.002
GLY-460	460	-0.0102	0.0002	0.0617	0.0012	0	0	0.0515	0.0011
LEU-462	462	-0.0073	0.0001	0.0223	0.0008	0	0	0.0149	0.0007
PHE-463	463	0.0015	0.0003	-0.0176	0.0017	0	0	-0.0161	0.0014
GLY-465	465	0.005	0.0005	-0.047	0.0013	0	0	-0.042	0.0012
PRO-466	466	-0.0085	0.0002	-0.0007	0.0016	0	0	-0.0092	0.0015
GLY-467	467	-0.0107	0.0002	0.0122	0.0009	0	0	0.0016	0.001
ILE-468	468	0.0165	0.0004	-0.0336	0.0015	0	0	-0.0171	0.0015
GLY-469	469	-0.007	0.0005	-0.0256	0.0011	0	0	-0.0326	0.0012
PRO-470	470	-0.0226	0.0006	-0.0454	0.0018	0	0	-0.068	0.0021
TRP-471	471	-0.0209	0.0005	-0.0475	0.0021	0	0	-0.0683	0.0019
GLY-472	472	-0.0028	0.0004	0.0201	0.0011	0	0	0.0172	0.001
GLU-473	473	0.0761	0.0062	-0.1548	0.0024	0	0	-0.0789	0.0058
ASP-474	474	0.1039	0.0085	-0.1543	0.0046	0	0	-0.0503	0.0073
ALA-475	475	0.0036	0.0003	-0.001	0.0004	0	0	0.0026	0.0004
ARG-476	476	-0.0596	0.0073	0.0377	0.0017	0	0	-0.022	0.0076
ASN-477	477	-0.0021	0.0002	-0.0004	0.0001	0	0	-0.0025	0.0003
PRO-478	478	0.002	0.0001	0.0004	0.0001	0	0	0.0024	0.0002
PHE-479	479	0.0022	0.0001	0	0	0	0	0.0023	0.0001
LEU-480	480	0.0132	0.0054	-0.0008	0.0001	0	0	0.0123	0.0054
