# Supplementary figures and images for: Systematic Structure-Based Search for Ochratoxin-Degrading Enzymes in Proteomes from Filamentous Fungi
Source: MDPI journal article supplement (doi:10.3390/biom11071040), 2021-07-16

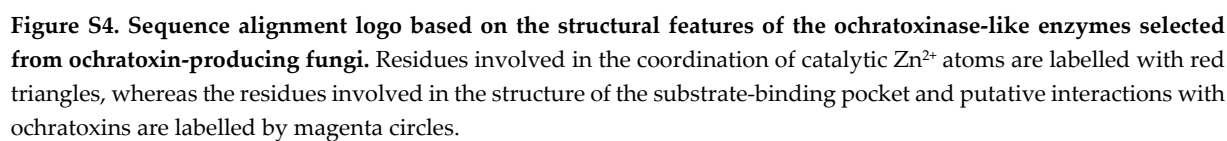

Supplement: s1 [file s1]
